# Supplementary material
Source: MDPI journal article supplement (https://www.mdpi.com/2071-1050/12/3/821)
Supplement: s1 [file s1]

## Supplementary Materials

### Environmental Citizenship Questionnaire - ECQ

#### Part A. Activities as Environmental Citizen – Past and Present

1. Have you ever been involved in activities of any of the following organisations, clubs, or groups outside school?

(Please tick **only one** box in each row)

|                                                                                | Yes, I have done this <u>within the last six months</u> | Yes, I have done this <u>but more than six months ago</u> | Yes, I have done this but <u>more than a year ago</u> | No, I have never done this |
|--------------------------------------------------------------------------------|---------------------------------------------------------|-----------------------------------------------------------|-------------------------------------------------------|----------------------------|
| a) An environmental action group                                               | <input type="checkbox"/> 1                              | <input type="checkbox"/> 2                                | <input type="checkbox"/> 3                            | <input type="checkbox"/> 4 |
| b) An environmental organisation                                               | <input type="checkbox"/> 1                              | <input type="checkbox"/> 2                                | <input type="checkbox"/> 3                            | <input type="checkbox"/> 4 |
| c) A human rights organisation                                                 | <input type="checkbox"/> 1                              | <input type="checkbox"/> 2                                | <input type="checkbox"/> 3                            | <input type="checkbox"/> 4 |
| d) A voluntary group doing something to help the community ( <b>excluded</b> ) | <input type="checkbox"/> 1                              | <input type="checkbox"/> 2                                | <input type="checkbox"/> 3                            | <input type="checkbox"/> 4 |
| e) An organisation collecting money for an environmental purpose               | <input type="checkbox"/> 1                              | <input type="checkbox"/> 2                                | <input type="checkbox"/> 3                            | <input type="checkbox"/> 4 |
| f) A group of young people campaigning for an environmental issue              | <input type="checkbox"/> 1                              | <input type="checkbox"/> 2                                | <input type="checkbox"/> 3                            | <input type="checkbox"/> 4 |
| g) An animal rights or animal welfare group                                    | <input type="checkbox"/> 1                              | <input type="checkbox"/> 2                                | <input type="checkbox"/> 3                            | <input type="checkbox"/> 4 |

#### Part B: Competences of an Environmental Citizen

2. At school, to what extent have you learned about the following topics?

(Please tick **only one** box in each row)

|                                                                                      | Not at all                 | To a small extent          | To a moderate extent       | To a large extent          |
|--------------------------------------------------------------------------------------|----------------------------|----------------------------|----------------------------|----------------------------|
| a) How to contribute to the prevention of environmental problems                     | <input type="checkbox"/> 1 | <input type="checkbox"/> 2 | <input type="checkbox"/> 3 | <input type="checkbox"/> 4 |
| b) How to contribute to the solution of environmental problems                       | <input type="checkbox"/> 1 | <input type="checkbox"/> 2 | <input type="checkbox"/> 3 | <input type="checkbox"/> 4 |
| c) How to develop a healthy relationship with nature                                 | <input type="checkbox"/> 1 | <input type="checkbox"/> 2 | <input type="checkbox"/> 3 | <input type="checkbox"/> 4 |
| d) How to contribute to the achievement of sustainability                            | <input type="checkbox"/> 1 | <input type="checkbox"/> 2 | <input type="checkbox"/> 3 | <input type="checkbox"/> 4 |
| e) What are the environmental rights and duties of a citizen                         | <input type="checkbox"/> 1 | <input type="checkbox"/> 2 | <input type="checkbox"/> 3 | <input type="checkbox"/> 4 |
| f) How to assess structural causes of environmental degradation and problems (roots) | <input type="checkbox"/> 1 | <input type="checkbox"/> 2 | <input type="checkbox"/> 3 | <input type="checkbox"/> 4 |
| g) How to actively participate in society                                            | <input type="checkbox"/> 1 | <input type="checkbox"/> 2 | <input type="checkbox"/> 3 | <input type="checkbox"/> 4 |
| h) How to promote inter- and intra-generational justice                              | <input type="checkbox"/> 1 | <input type="checkbox"/> 2 | <input type="checkbox"/> 3 | <input type="checkbox"/> 4 |
| i) How to act and network at a local level (community, town, area)                   | <input type="checkbox"/> 1 | <input type="checkbox"/> 2 | <input type="checkbox"/> 3 | <input type="checkbox"/> 4 |

|                                                         |                            |                            |                            |                            |
|---------------------------------------------------------|----------------------------|----------------------------|----------------------------|----------------------------|
| j) How to act and network at a national level (country) | <input type="checkbox"/> 1 | <input type="checkbox"/> 2 | <input type="checkbox"/> 3 | <input type="checkbox"/> 4 |
| k) How to act and network at a global level             | <input type="checkbox"/> 1 | <input type="checkbox"/> 2 | <input type="checkbox"/> 3 | <input type="checkbox"/> 4 |

3. How important are the following behaviours for being a good environmental citizen?

(Please tick **only one** box in each row)

|                                                                                                         | Not important at all       | Not very important         | Quite important            | Very important             |
|---------------------------------------------------------------------------------------------------------|----------------------------|----------------------------|----------------------------|----------------------------|
| a) Voting in every national election                                                                    | <input type="checkbox"/> 1 | <input type="checkbox"/> 2 | <input type="checkbox"/> 3 | <input type="checkbox"/> 4 |
| b) Joining a political party                                                                            | <input type="checkbox"/> 1 | <input type="checkbox"/> 2 | <input type="checkbox"/> 3 | <input type="checkbox"/> 4 |
| c) Following environmental issues in the newspaper, on the radio, on TV, or on the Internet             | <input type="checkbox"/> 1 | <input type="checkbox"/> 2 | <input type="checkbox"/> 3 | <input type="checkbox"/> 4 |
| d) Showing respect for government representatives                                                       | <input type="checkbox"/> 1 | <input type="checkbox"/> 2 | <input type="checkbox"/> 3 | <input type="checkbox"/> 4 |
| e) Engaging in environmental discussions                                                                | <input type="checkbox"/> 1 | <input type="checkbox"/> 2 | <input type="checkbox"/> 3 | <input type="checkbox"/> 4 |
| f) Making personal efforts to protect natural resources (e.g., through saving water or recycling waste) | <input type="checkbox"/> 1 | <input type="checkbox"/> 2 | <input type="checkbox"/> 3 | <input type="checkbox"/> 4 |
| g) Respecting the rights of others to have their own opinions                                           | <input type="checkbox"/> 1 | <input type="checkbox"/> 2 | <input type="checkbox"/> 3 | <input type="checkbox"/> 4 |
| h) Supporting people who are worse off than you                                                         | <input type="checkbox"/> 1 | <input type="checkbox"/> 2 | <input type="checkbox"/> 3 | <input type="checkbox"/> 4 |
| i) Engaging in activities to help people in less developed countries                                    | <input type="checkbox"/> 1 | <input type="checkbox"/> 2 | <input type="checkbox"/> 3 | <input type="checkbox"/> 4 |
| j) Participating in peaceful protests against laws believed to be unjust                                | <input type="checkbox"/> 1 | <input type="checkbox"/> 2 | <input type="checkbox"/> 3 | <input type="checkbox"/> 4 |
| k) Taking part in activities promoting environmental rights                                             | <input type="checkbox"/> 1 | <input type="checkbox"/> 2 | <input type="checkbox"/> 3 | <input type="checkbox"/> 4 |
| l) Participating in activities to benefit the environment                                               | <input type="checkbox"/> 1 | <input type="checkbox"/> 2 | <input type="checkbox"/> 3 | <input type="checkbox"/> 4 |

4. How well do you think you would do the following activities, now, as a student?

(Please tick **only one** box in each row)

|                                                                                             | Not at all                 | Not very well              | Fairly well                | Very well                  |
|---------------------------------------------------------------------------------------------|----------------------------|----------------------------|----------------------------|----------------------------|
| a) Discuss a newspaper article about an environmental conflict                              | <input type="checkbox"/> 1 | <input type="checkbox"/> 2 | <input type="checkbox"/> 3 | <input type="checkbox"/> 4 |
| b) Argue your point of view about a controversial environmental issue                       | <input type="checkbox"/> 1 | <input type="checkbox"/> 2 | <input type="checkbox"/> 3 | <input type="checkbox"/> 4 |
| c) Organise a group of students to achieve environmental changes at school                  | <input type="checkbox"/> 1 | <input type="checkbox"/> 2 | <input type="checkbox"/> 3 | <input type="checkbox"/> 4 |
| d) Follow a television debate about a controversial environmental issue                     | <input type="checkbox"/> 1 | <input type="checkbox"/> 2 | <input type="checkbox"/> 3 | <input type="checkbox"/> 4 |
| e) Write a letter or email to a newspaper giving your view on a current environmental issue | <input type="checkbox"/> 1 | <input type="checkbox"/> 2 | <input type="checkbox"/> 3 | <input type="checkbox"/> 4 |
| f) Speak in front of your class about an environmental issue                                | <input type="checkbox"/> 1 | <input type="checkbox"/> 2 | <input type="checkbox"/> 3 | <input type="checkbox"/> 4 |

5. The following statements are related to our relationship to the environment. There are no right or wrong answers. (Please tick **only one** box in each row)

| I think that...                                                                                                                      | Very much disagree         | Disagree                   | Agree                      | Very much agree            |
|--------------------------------------------------------------------------------------------------------------------------------------|----------------------------|----------------------------|----------------------------|----------------------------|
| a) Using more natural resources than we need does not threaten the health and well-being of people in the future ( <b>excluded</b> ) | <input type="checkbox"/> 1 | <input type="checkbox"/> 2 | <input type="checkbox"/> 3 | <input type="checkbox"/> 4 |

|                                                                                                                                   |                            |                            |                            |                            |
|-----------------------------------------------------------------------------------------------------------------------------------|----------------------------|----------------------------|----------------------------|----------------------------|
| b) We need stricter laws and regulations to protect the environment                                                               | <input type="checkbox"/> 1 | <input type="checkbox"/> 2 | <input type="checkbox"/> 3 | <input type="checkbox"/> 4 |
| c) It is important to take measures against problems which have to do with climate change                                         | <input type="checkbox"/> 1 | <input type="checkbox"/> 2 | <input type="checkbox"/> 3 | <input type="checkbox"/> 4 |
| d) Everyone ought to be given the opportunity to acquire the knowledge, values, and skills that are necessary to live sustainably | <input type="checkbox"/> 1 | <input type="checkbox"/> 2 | <input type="checkbox"/> 3 | <input type="checkbox"/> 4 |
| e) We who are living now should make sure that people in the future enjoy the same quality of life as we do today                 | <input type="checkbox"/> 1 | <input type="checkbox"/> 2 | <input type="checkbox"/> 3 | <input type="checkbox"/> 4 |
| f) Women and men throughout the world must be given the same opportunities for education and employment                           | <input type="checkbox"/> 1 | <input type="checkbox"/> 2 | <input type="checkbox"/> 3 | <input type="checkbox"/> 4 |
| g) Companies have a responsibility to reduce the use of packaging and disposable articles                                         | <input type="checkbox"/> 1 | <input type="checkbox"/> 2 | <input type="checkbox"/> 3 | <input type="checkbox"/> 4 |
| h) It is important to reduce poverty                                                                                              | <input type="checkbox"/> 1 | <input type="checkbox"/> 2 | <input type="checkbox"/> 3 | <input type="checkbox"/> 4 |
| i) Companies in rich countries should give employees in poor nations the same conditions as in rich countries                     | <input type="checkbox"/> 1 | <input type="checkbox"/> 2 | <input type="checkbox"/> 3 | <input type="checkbox"/> 4 |

6. How important for you are the following statements? (Please tick only one box in each row)

| It is important to me to / that...                | Not important              | Slightly important         | Important                  | Most important             |
|---------------------------------------------------|----------------------------|----------------------------|----------------------------|----------------------------|
| a) Prevent environmental pollution                | <input type="checkbox"/> 1 | <input type="checkbox"/> 2 | <input type="checkbox"/> 3 | <input type="checkbox"/> 4 |
| b) Protect the environment                        | <input type="checkbox"/> 1 | <input type="checkbox"/> 2 | <input type="checkbox"/> 3 | <input type="checkbox"/> 4 |
| c) Respect nature                                 | <input type="checkbox"/> 1 | <input type="checkbox"/> 2 | <input type="checkbox"/> 3 | <input type="checkbox"/> 4 |
| d) Be in unity with nature                        | <input type="checkbox"/> 1 | <input type="checkbox"/> 2 | <input type="checkbox"/> 3 | <input type="checkbox"/> 4 |
| e) Every person have equal opportunities          | <input type="checkbox"/> 1 | <input type="checkbox"/> 2 | <input type="checkbox"/> 3 | <input type="checkbox"/> 4 |
| f) Take care of those who are worse off           | <input type="checkbox"/> 1 | <input type="checkbox"/> 2 | <input type="checkbox"/> 3 | <input type="checkbox"/> 4 |
| g) Every person is treated justly                 | <input type="checkbox"/> 1 | <input type="checkbox"/> 2 | <input type="checkbox"/> 3 | <input type="checkbox"/> 4 |
| h) There is no war or conflict                    | <input type="checkbox"/> 1 | <input type="checkbox"/> 2 | <input type="checkbox"/> 3 | <input type="checkbox"/> 4 |
| i) Be helpful to others                           | <input type="checkbox"/> 1 | <input type="checkbox"/> 2 | <input type="checkbox"/> 3 | <input type="checkbox"/> 4 |
| j) Have fun ( <b>excluded</b> )                   | <input type="checkbox"/> 1 | <input type="checkbox"/> 2 | <input type="checkbox"/> 3 | <input type="checkbox"/> 4 |
| k) Enjoy life's pleasures                         | <input type="checkbox"/> 1 | <input type="checkbox"/> 2 | <input type="checkbox"/> 3 | <input type="checkbox"/> 4 |
| l) Do things that I enjoy                         | <input type="checkbox"/> 1 | <input type="checkbox"/> 2 | <input type="checkbox"/> 3 | <input type="checkbox"/> 4 |
| m) Have control over others' actions              | <input type="checkbox"/> 1 | <input type="checkbox"/> 2 | <input type="checkbox"/> 3 | <input type="checkbox"/> 4 |
| n) Have authority over others ( <b>excluded</b> ) | <input type="checkbox"/> 1 | <input type="checkbox"/> 2 | <input type="checkbox"/> 3 | <input type="checkbox"/> 4 |
| o) Be influential                                 | <input type="checkbox"/> 1 | <input type="checkbox"/> 2 | <input type="checkbox"/> 3 | <input type="checkbox"/> 4 |
| p) Have many possessions                          | <input type="checkbox"/> 1 | <input type="checkbox"/> 2 | <input type="checkbox"/> 3 | <input type="checkbox"/> 4 |
| q) Work hard and be ambitious                     | <input type="checkbox"/> 1 | <input type="checkbox"/> 2 | <input type="checkbox"/> 3 | <input type="checkbox"/> 4 |

### Part C: Intention to act in the future as an Environmental Citizen

7. Listed below are different activities that might be offered at your school. If you were given the chance, how likely is it that you would participate in each activity as a student inside your school?

(Please tick **only one** box in each row)

|                                                                                                       | Not at all likely          | Not very likely            | Quite likely               | Very likely                |
|-------------------------------------------------------------------------------------------------------|----------------------------|----------------------------|----------------------------|----------------------------|
| a) Join a group of students campaigning for an environmental issue you agree with                     | <input type="checkbox"/> 1 | <input type="checkbox"/> 2 | <input type="checkbox"/> 3 | <input type="checkbox"/> 4 |
| b) Take part in environmental discussions in a 'student assembly'                                     | <input type="checkbox"/> 1 | <input type="checkbox"/> 2 | <input type="checkbox"/> 3 | <input type="checkbox"/> 4 |
| c) Participate in writing articles for a school newspaper or website regarding an environmental issue | <input type="checkbox"/> 1 | <input type="checkbox"/> 2 | <input type="checkbox"/> 3 | <input type="checkbox"/> 4 |
| d) Organise a group of students to achieve environmental changes at school                            | <input type="checkbox"/> 1 | <input type="checkbox"/> 2 | <input type="checkbox"/> 3 | <input type="checkbox"/> 4 |

8. There are many different ways in which environmental citizens may express their opinions about important issues in society. Would you take part in any of the following activities to express your opinion in the future as a student outside school?

(Please tick **only one** box in each row)

|                                                                                                               | I would<br>certainly <b>not</b><br>do this | I would<br>probably <b>not</b><br>do this | I would<br>probably do<br>this | I would<br>certainly do<br>this |
|---------------------------------------------------------------------------------------------------------------|--------------------------------------------|-------------------------------------------|--------------------------------|---------------------------------|
| a) Talk to others about your views on environmental issues                                                    | <input type="checkbox"/> 1                 | <input type="checkbox"/> 2                | <input type="checkbox"/> 3     | <input type="checkbox"/> 4      |
| b) Contact an elected representative                                                                          | <input type="checkbox"/> 1                 | <input type="checkbox"/> 2                | <input type="checkbox"/> 3     | <input type="checkbox"/> 4      |
| c) Take part in a peaceful march or rally                                                                     | <input type="checkbox"/> 1                 | <input type="checkbox"/> 2                | <input type="checkbox"/> 3     | <input type="checkbox"/> 4      |
| d) Collect signatures for a petition                                                                          | <input type="checkbox"/> 1                 | <input type="checkbox"/> 2                | <input type="checkbox"/> 3     | <input type="checkbox"/> 4      |
| e) Contribute to an online discussion forum about environmental issues                                        | <input type="checkbox"/> 1                 | <input type="checkbox"/> 2                | <input type="checkbox"/> 3     | <input type="checkbox"/> 4      |
| f) Organise an online group to take a stance on a controversial environmental issue                           | <input type="checkbox"/> 1                 | <input type="checkbox"/> 2                | <input type="checkbox"/> 3     | <input type="checkbox"/> 4      |
| g) Participate in an online campaign                                                                          | <input type="checkbox"/> 1                 | <input type="checkbox"/> 2                | <input type="checkbox"/> 3     | <input type="checkbox"/> 4      |
| h) Choose to buy certain products in support of social justice (e.g., fair trade, ethically sourced products) | <input type="checkbox"/> 1                 | <input type="checkbox"/> 2                | <input type="checkbox"/> 3     | <input type="checkbox"/> 4      |
| i) Spray-paint protest slogans on walls                                                                       | <input type="checkbox"/> 1                 | <input type="checkbox"/> 2                | <input type="checkbox"/> 3     | <input type="checkbox"/> 4      |
| j) Stage a protest by blocking traffic                                                                        | <input type="checkbox"/> 1                 | <input type="checkbox"/> 2                | <input type="checkbox"/> 3     | <input type="checkbox"/> 4      |
| k) Occupy public buildings as a sign of protest                                                               | <input type="checkbox"/> 1                 | <input type="checkbox"/> 2                | <input type="checkbox"/> 3     | <input type="checkbox"/> 4      |

9. How likely is it you would do the following in the future?

(Please tick **only one** box in each row)

|                                                                                     | I would<br>certainly <b>not</b> do<br>this | I would<br>probably <b>not</b> do<br>this | I would<br>probably do<br>this | I would<br>certainly do<br>this |
|-------------------------------------------------------------------------------------|--------------------------------------------|-------------------------------------------|--------------------------------|---------------------------------|
| a) I would try to change society and promote sustainability                         | <input type="checkbox"/> 1                 | <input type="checkbox"/> 2                | <input type="checkbox"/> 3     | <input type="checkbox"/> 4      |
| b) I would educate my peers but also adults to act in eco-friendly ways             | <input type="checkbox"/> 1                 | <input type="checkbox"/> 2                | <input type="checkbox"/> 3     | <input type="checkbox"/> 4      |
| c) I would actively participate in decision-making and also engage in action-taking | <input type="checkbox"/> 1                 | <input type="checkbox"/> 2                | <input type="checkbox"/> 3     | <input type="checkbox"/> 4      |
